# Supplementary material for: A phase 1 study of ACE-536, a regulator of erythroid differentiation, in healthy volunteers
Source: PubMed Central journal article supplement — Am J Hematol. 2014 Apr 9;89(7):766–70. doi: 10.1002/ajh.23732 (PMC4173124; doi:10.1002/ajh.23732), 2014-04-09
Supplement: ajh0089-0766-SD1.pdf [file ajh0089-0766-SD1.pdf]

**Supplementary Table 1. Demographics and baseline characteristics**

|                                                 | Placebo<br>N=8      | ACE-536 Treatment (mg/kg) |                     |                     |                     | Overall<br>N=32     |
|-------------------------------------------------|---------------------|---------------------------|---------------------|---------------------|---------------------|---------------------|
|                                                 |                     | 0.0625<br>N=6             | 0.125 x 1<br>N=6    | 0.125 x 2<br>N=6    | 0.25<br>N=6         |                     |
| <b>Age (yr), mean (SD), range</b>               | 58.6 (4.7)<br>55-69 | 59.3 (7.5)<br>49-69       | 57.7 (5.8)<br>52-68 | 60.5 (2.6)<br>56-64 | 61.0 (8.7)<br>50-71 | 59.4 (5.8)<br>49-71 |
| <b>Weight (kg), mean (SD)</b>                   | 65.3 (7.5)          | 71.3 (3.4)                | 70.5 (7.8)          | 68.8 (10.6)         | 69.2 (9.6)          | 68.8 (7.9)          |
| <b>Height (cm), mean (SD)</b>                   | 163.5 (5.5)         | 162.0 (6.1)               | 161.7 (7.6)         | 166.2 (5.3)         | 159.2 (6.8)         | 162.6 (6.2)         |
| <b>BMI (kg/m<sup>2</sup>), mean (SD)</b>        | 24.4 (2.3)          | 27.3 (3.3)                | 26.9 (2.2)          | 24.9 (3.0)          | 27.2 (2.9)          | 26.1 (3.0)          |
| <b>Hemoglobin, Screening, (g/dL), mean (SD)</b> | 13.1 (0.6)          | 13.3 (0.5)                | 13.3 (0.6)          | 13.1 (1.0)          | 13.6 (0.5)          | 13.3 (0.6)          |
| <b>Hemoglobin, Day -1, (g/dL), mean (SD)</b>    | 13.1 (0.6)          | 13.2 (0.6)                | 13.3 (0.3)          | 13.1 (0.9)          | 13.2 (0.7)          | 13.2 (0.6)          |
| <b>Race, n (%)</b>                              |                     |                           |                     |                     |                     |                     |
| American Indian/Alaska Native                   | 1 (13%)             | 1 (17%)                   | 0 (0%)              | 0 (0%)              | 0 (0%)              | 2 (6%)              |
| Black or African American                       | 1 (13%)             | 1 (17%)                   | 0 (0%)              | 0 (0%)              | 0 (0%)              | 2 (6%)              |
| White                                           | 6 (75%)             | 4 (67%)                   | 6 (100%)            | 6 (100%)            | 6 (100%)            | 28 (88%)            |
| <b>Ethnicity n (%)</b>                          |                     |                           |                     |                     |                     |                     |
| Hispanic or Latino                              | 2 (25%)             | 0 (0%)                    | 3 (50%)             | 0 (0%)              | 2 (33%)             | 7 (22%)             |
| Non-Hispanic or Latino                          | 6 (75%)             | 6 (100%)                  | 3 (50%)             | 6 (100%)            | 4 (67%)             | 25 (78%)            |

**Supplementary Table 2. Treatment-related adverse events by treatment group, n (%) of subjects**

| System Organ Class<br>Preferred Term                        | ACE-536 (mg/kg) |                  |                  |             | Placebo<br>N=8 |
|-------------------------------------------------------------|-----------------|------------------|------------------|-------------|----------------|
|                                                             | 0.0625<br>N=6   | 0.125 x 1<br>N=6 | 0.125 x 2<br>N=6 | 0.25<br>N=6 |                |
| <b>Musculoskeletal and Connective Tissue Disorders</b>      |                 |                  |                  |             |                |
| Myalgia                                                     | 1 (17%)         | -                | -                | -           | -              |
| Muscle spasms                                               | -               | -                | 1 (17%)          | -           | -              |
| <b>Skin and Subcutaneous Tissue Disorders</b>               |                 |                  |                  |             |                |
| Pruritus generalized                                        | -               | -                | -                | 1 (17%)     | -              |
| Rash papular                                                | -               | -                | -                | 1 (17%)     | -              |
| Dry skin                                                    | -               | -                | -                | 1 (17%)     | -              |
| Macule                                                      | -               | -                | 1 (17%)          | -           | -              |
| <b>Nervous System Disorders</b>                             |                 |                  |                  |             |                |
| Hyperesthesia                                               | -               | -                | -                | 1(17%)      | -              |
| <b>General Disorders and Administrative Site Conditions</b> |                 |                  |                  |             |                |
| Injection site hemorrhage                                   | 1 (17%)         | 1 (17%)          | -                | 1 (17%)     | -              |
| Injection site macule                                       | -               | -                | 1 (17%)          | 1 (17%)     | -              |
| Injection site pain                                         | -               | -                | -                | -           | 1 (13%)        |

**Supplementary Table 3. Pharmacokinetic parameters for ACE-536 after administration of first SC dose by treatment group, mean (SD).**

| Parameter                                                       | ACE-536 (mg/kg) |                     |                    |
|-----------------------------------------------------------------|-----------------|---------------------|--------------------|
|                                                                 | 0.0625<br>(N=6) | 0.125<br>(N=12)     | 0.25<br>(N=6)      |
| <b>AUC<sub>0-14</sub>, day*<math>\mu\text{g/mL}</math></b>      | 4.7 (1.1)       | 6.5 (3.2)           | 19.6 (4.3)         |
| <b>C<sub>max</sub>, <math>\mu\text{g/mL}</math><sup>a</sup></b> | 0.4 (0.1)       | 0.6 (0.2)           | 1.9 (0.4)          |
| <b>T<sub>max</sub>, days<sup>a</sup></b>                        | 7.0 (2.9)       | 9.8 (2.6)           | 8.0 (3.2)          |
| <b>t<sub>1/2</sub>, days</b>                                    | NC              | 16.2 (2.2)<br>N=7   | 14.9 (1.6)<br>N=5  |
| <b>Cl/F, mL/day/kg</b>                                          | NA              | 6.4 (3.4)<br>N=7    | 4.6 (0.5)<br>N=5   |
| <b>V<sub>z</sub>/F, mL/kg</b>                                   | NA              | 142.5 (61.1)<br>N=7 | 98.9 (17.2)<br>N=5 |

NC = Not computable; NA = Not applicable

<sup>a</sup> compartmental analysis (otherwise, non-compartmental analysis)
